# Supplementary material for: Computational screening of MBene monolayers with high electrocatalytic activity for the nitrogen reduction reaction
Source: Royal Society of Chemistry journal article supplement (doi:10.1039/d1nr04652g), 2021-01-01
Supplement: d1nr04652g1.pdf [file d1nr04652g1.pdf]

## Supporting Information

### Computational screening of MBene monolayers with high electrocatalytic activity for nitrogen reduction reaction

Yameng Li, Lei Li, Rao Huang, Yuhua Wen\*

Department of Physics, Xiamen University, Xiamen 361005, China. \*E-mail: yhw@xmu.edu.cn

#### 1. Definition of energy

The exfoliation energy for MB ((M=Sc, Ti, V, Cr, Mo, and W) monolayer was respectively calculated with the following equations as follows

$$E_{\text{exf}}(M_2AB_2) = E(M_2AB_2) + E(Al) - E(MAB), \quad (1)$$

$$E_{\text{exf}}(M_2B_2) = E(M_2B_2) + E(Al) - E(M_2AB_2), \quad (2)$$

$$E_{\text{exf}}(MB) = 2E(MB) - E(M_2B_2), \quad (3)$$

where the  $E(MAB)$ ,  $E(M_2AB_2)$ ,  $E(M_2B_2)$ ,  $E(MB)$ , and  $E(Al)$  are the total energy of MAB,  $M_2AB_2$ ,  $M_2B_2$ , MB (M=Sc, Ti, V, Cr, Mo, and W; A=Al), and exfoliated Al, respectively.

#### 2. Additional information

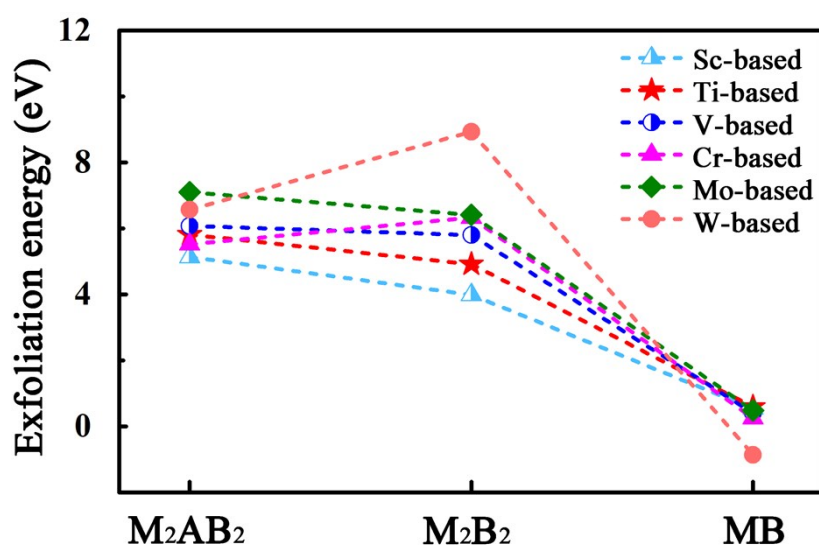

**Fig. S1** The calculated exfoliation energy from MAB to  $M_2AB_2$ , and from  $M_2AB_2$  to  $M_2B_2$ , and from  $M_2B_2$  to MB (M=Sc, Ti, V, Cr, Mo, and W; A=Al).

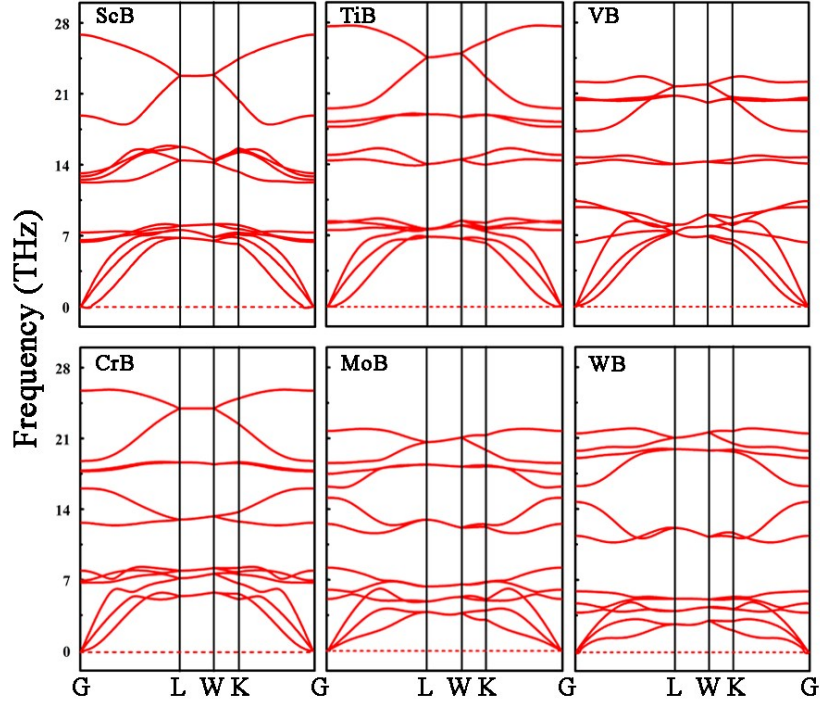

**Fig. S2** The calculated phonon dispersion curves of MB (M=Sc, Ti, V, Cr, Mo, and W) monolayers.

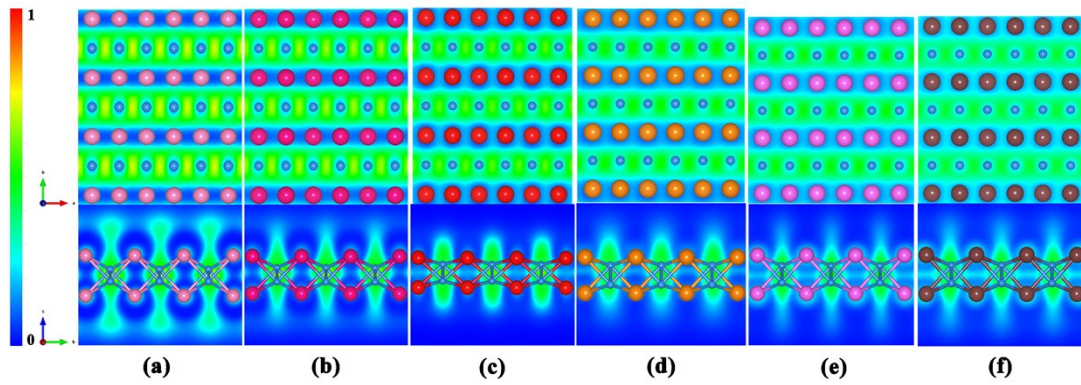

**Fig. S3** The electron localization functions (ELFs) of (a) ScB, (b) TiB, (c) CrB, (d) MoB, (e) WB, (f) VB monolayers from top (001) and side (100) views. ELF=0 means that the electrons are completely delocalized or do not exist, and ELF=1 illustrates that the electrons are completely localized.

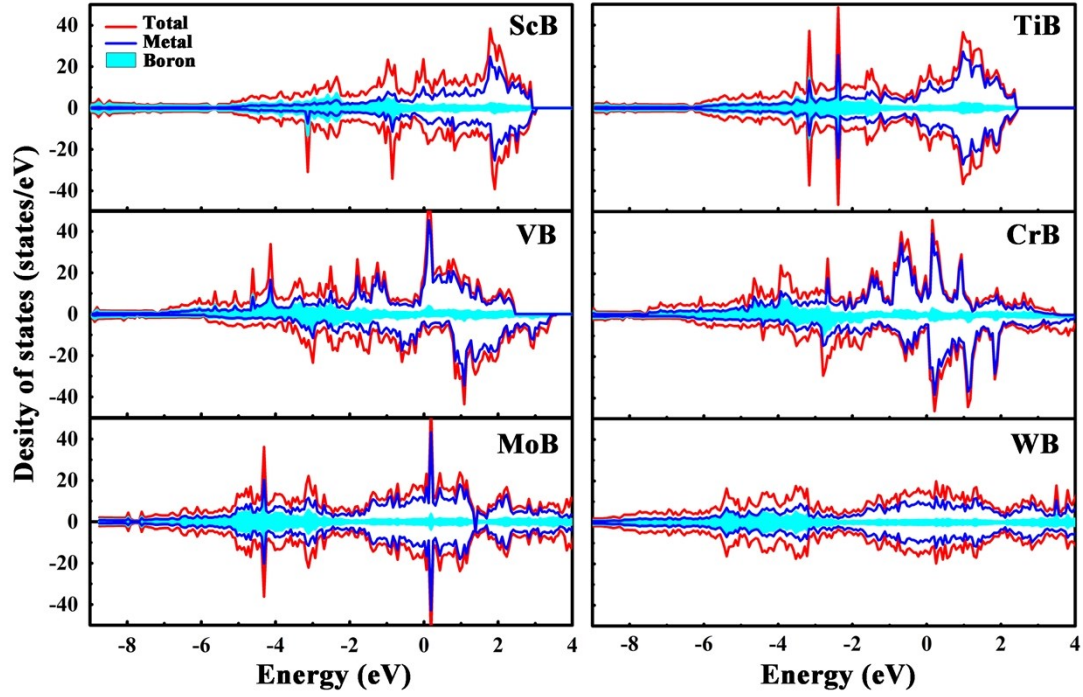

**Fig. S4** The density of states of states for ScB, TiB, VB, CrB, MoB, WB monolayers, respectively.

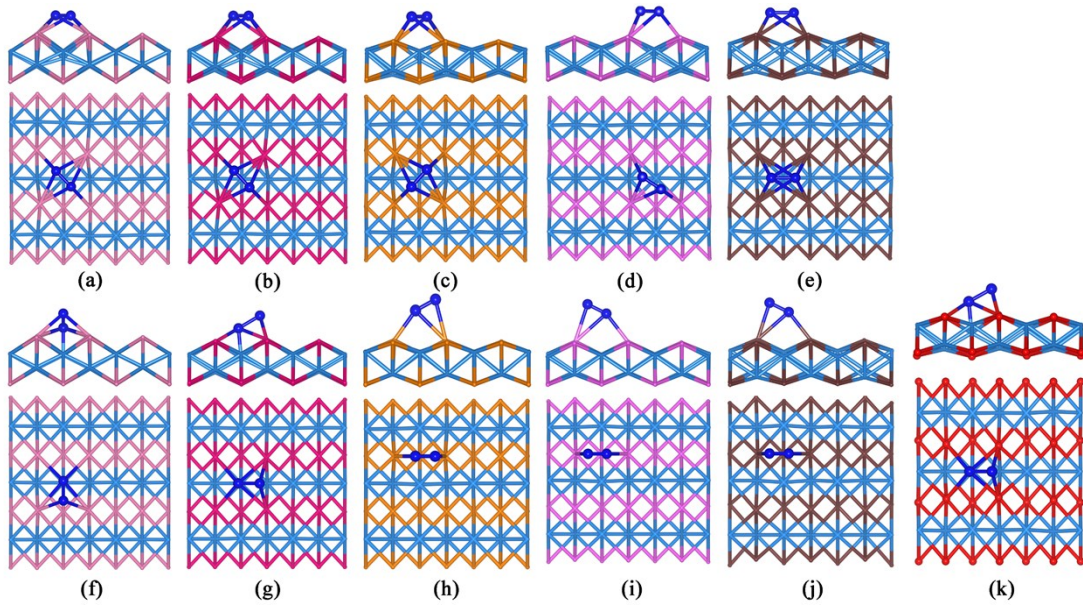

**Fig. S5** The side and top views of structures for  $N_2$  molecules with (a-e) side-on adsorption configurations on ScB, TiB, CrB, MoB, WB monolayer, respectively, and (f-k) end-on adsorption configurations on ScB, TiB, CrB, MoB, WB, VB monolayers, respectively.

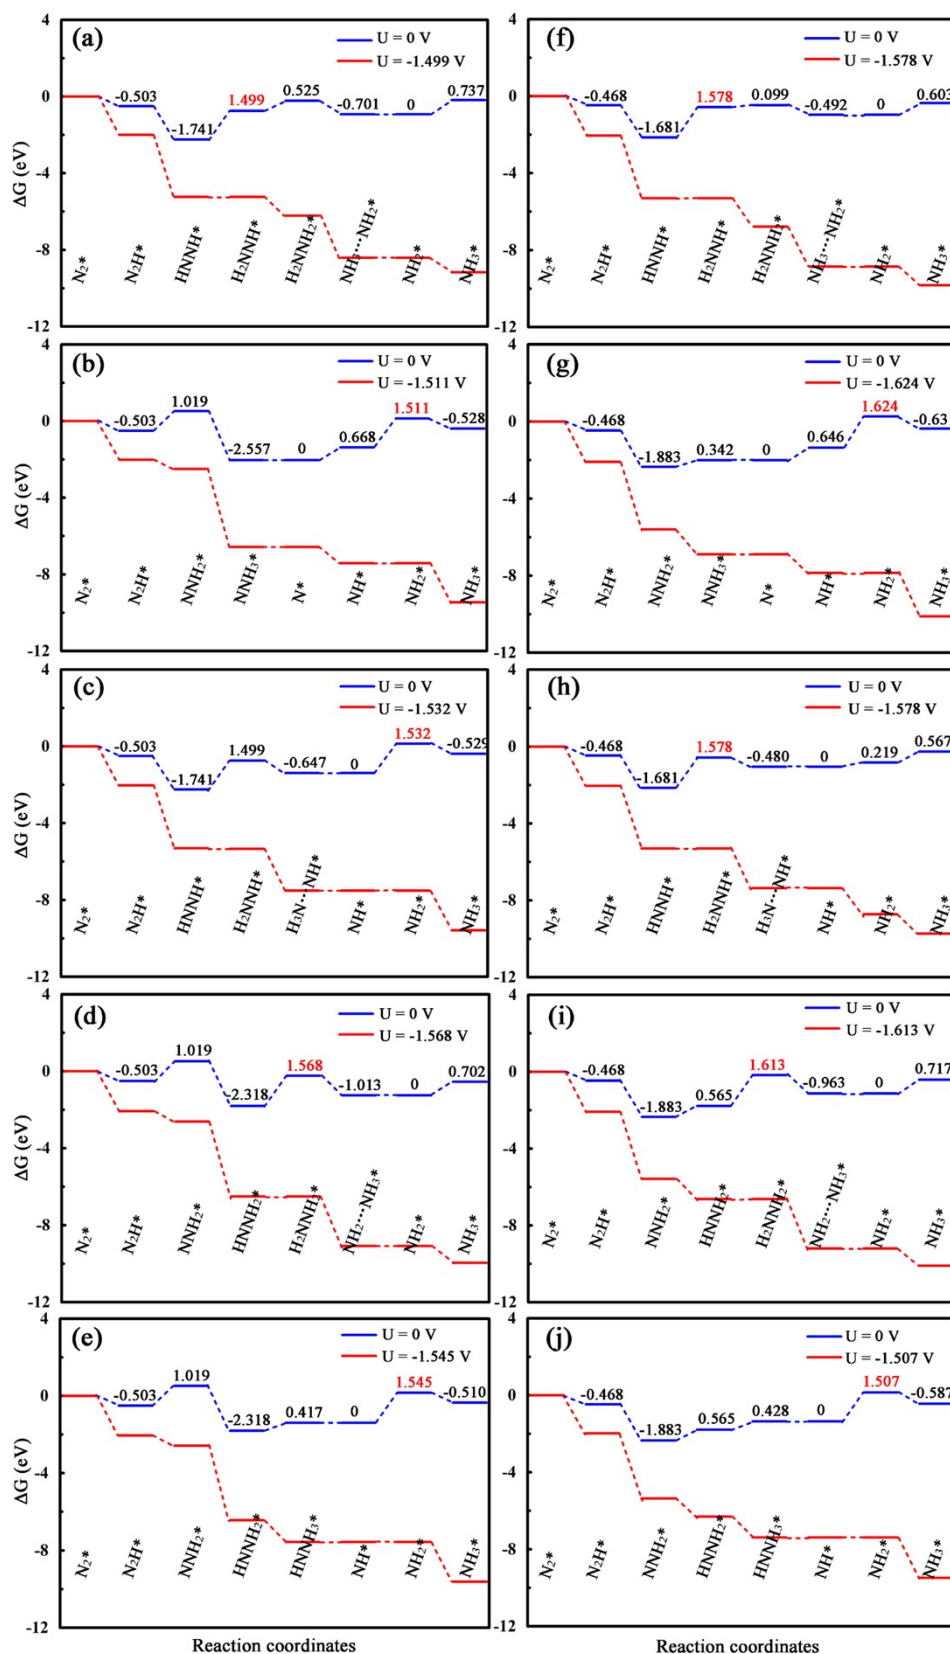

**Fig. S6** Free energy diagrams of  $N_2$  conversion into ammonia on ScB monolayer *via* five different reaction pathways at  $N_2$  adsorption configurations with (a-e) side-on and (f-j) end-on types, respectively.

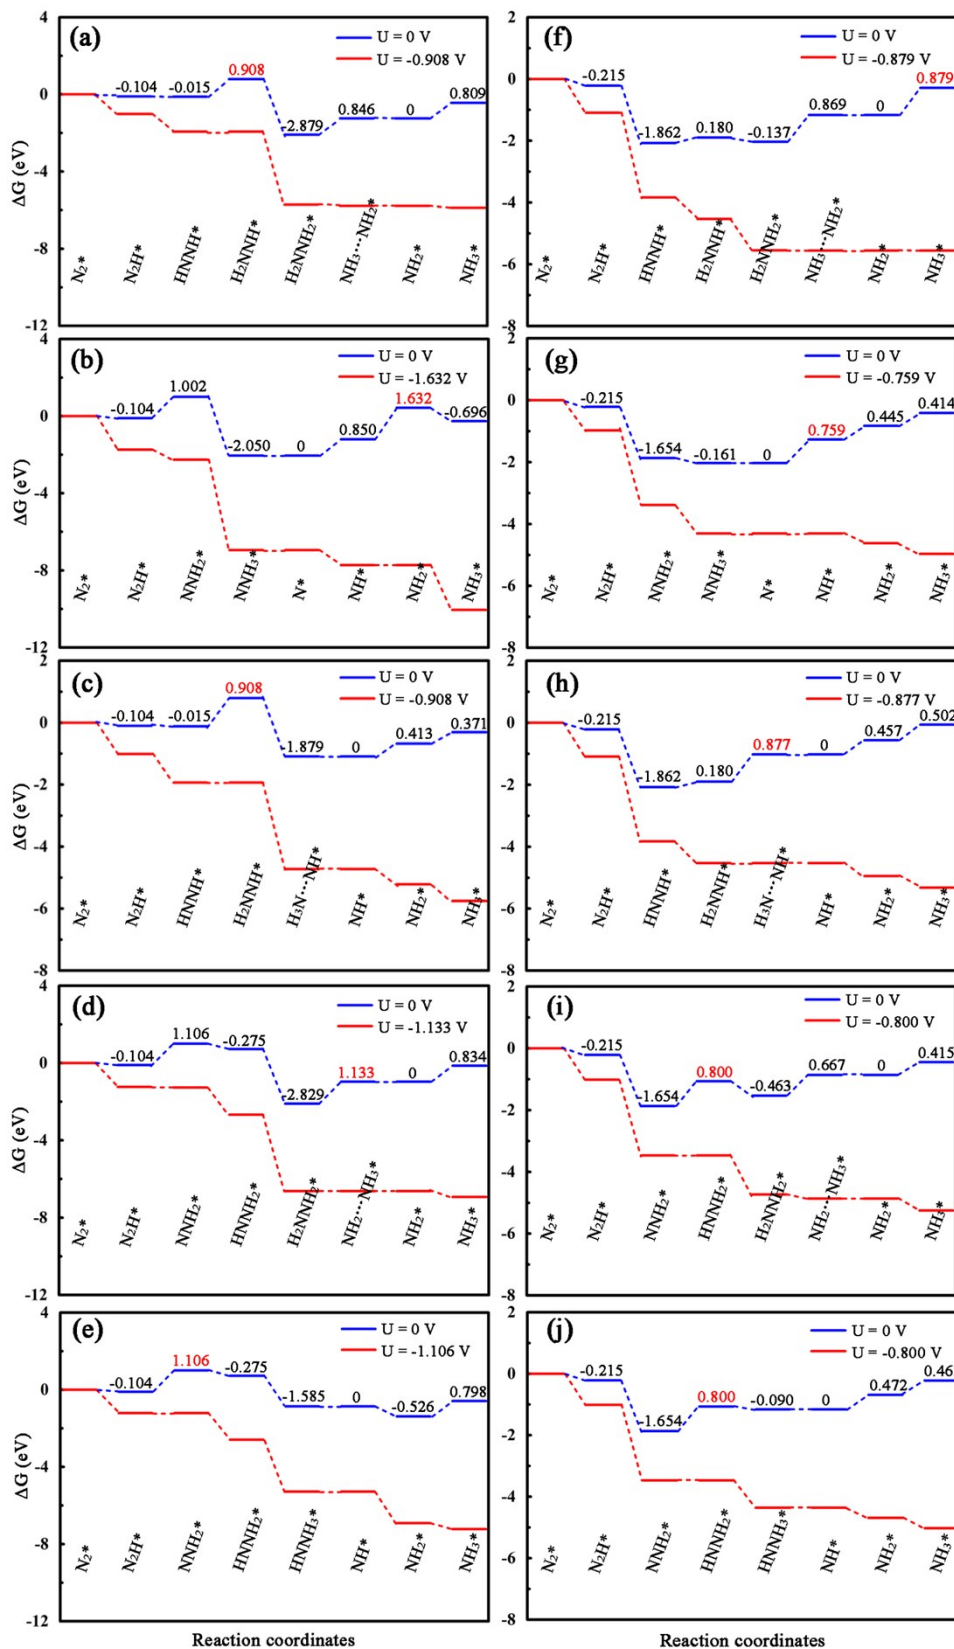

**Fig. S7** Free energy diagrams of  $N_2$  conversion into ammonia on TiB monolayer *via* five different reaction pathways at  $N_2$  adsorption configurations with (a-e) side-on and (f-j) end-on types, respectively.

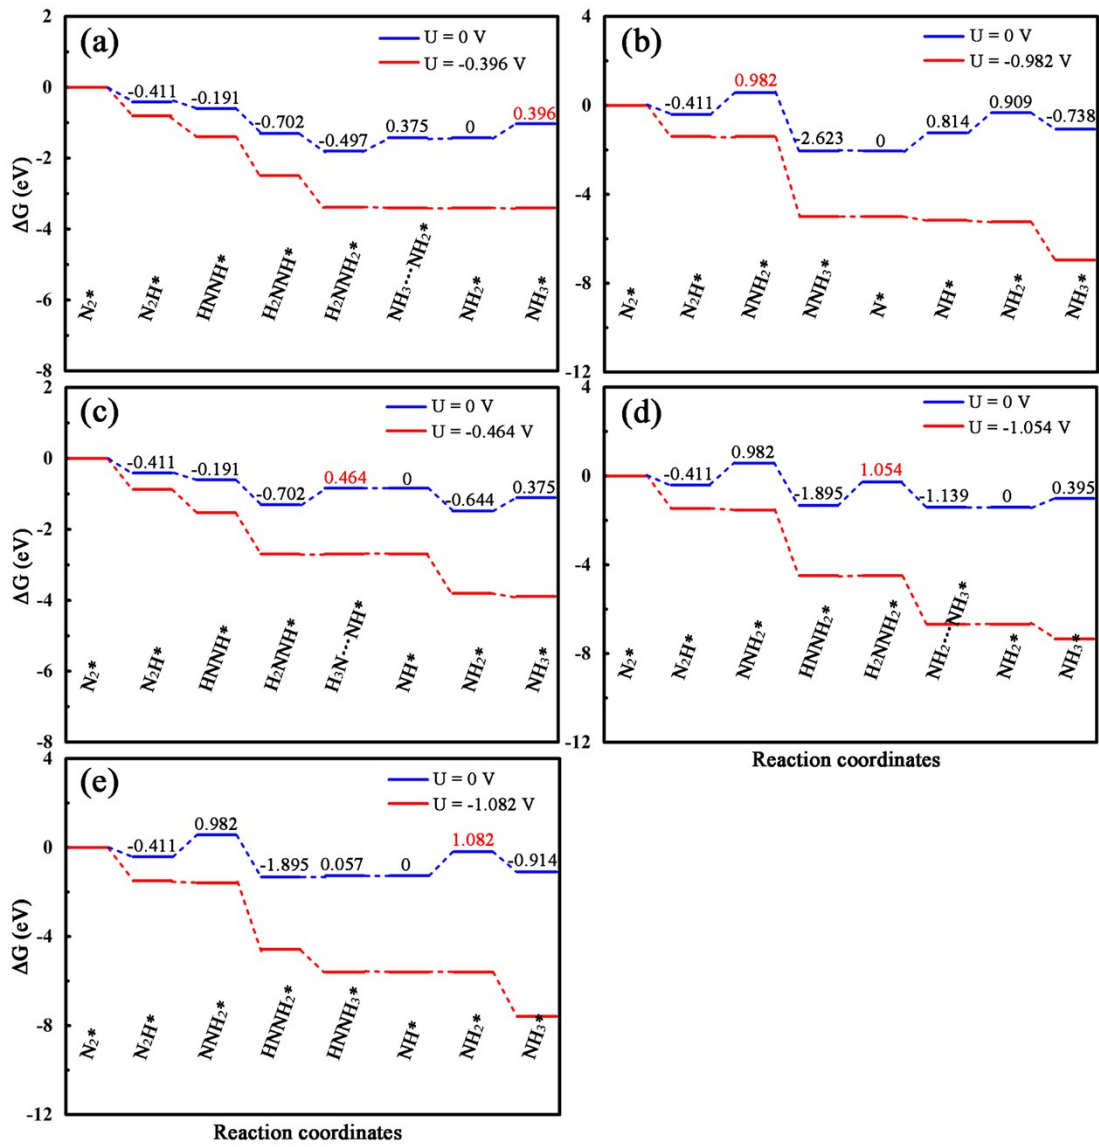

**Fig. S8** Free energy diagrams of  $N_2$  conversion into ammonia on VB monolayer via five different reaction pathways at  $N_2$  adsorption configurations with (a-e) end-on type, respectively.

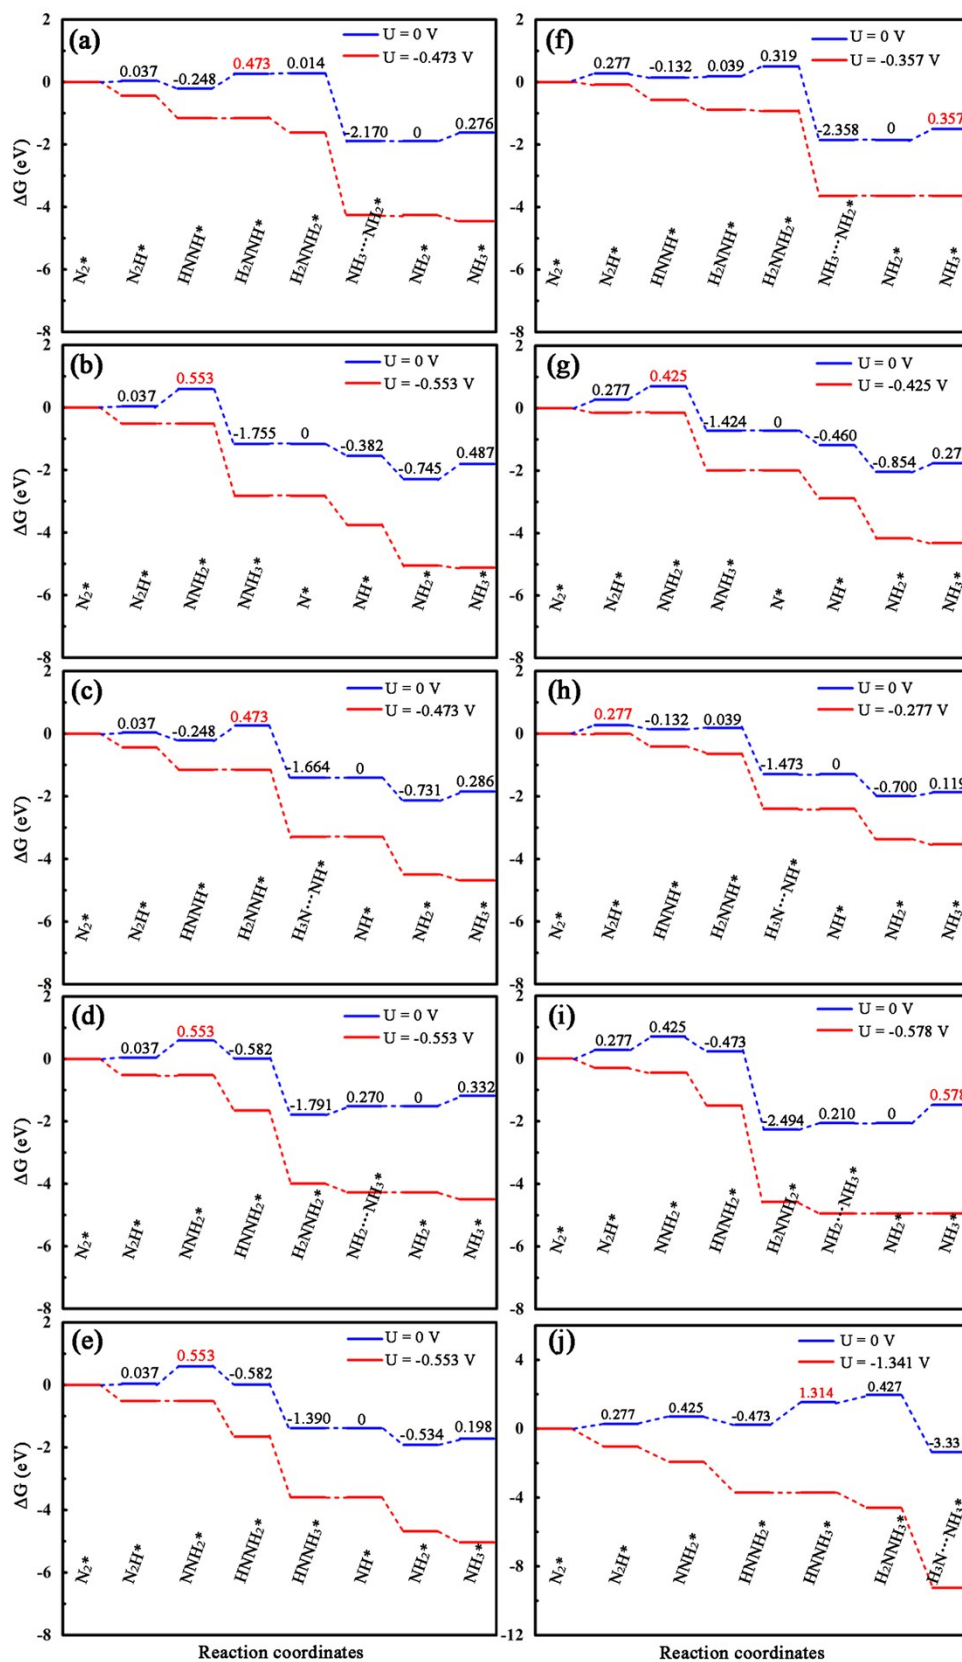

**Fig. S9** Free energy diagrams of  $N_2$  conversion into ammonia on CrB monolayer *via* five different reaction pathways at  $N_2$  adsorption configurations with (a-e) side-on and (f-j) end-on types, respectively.

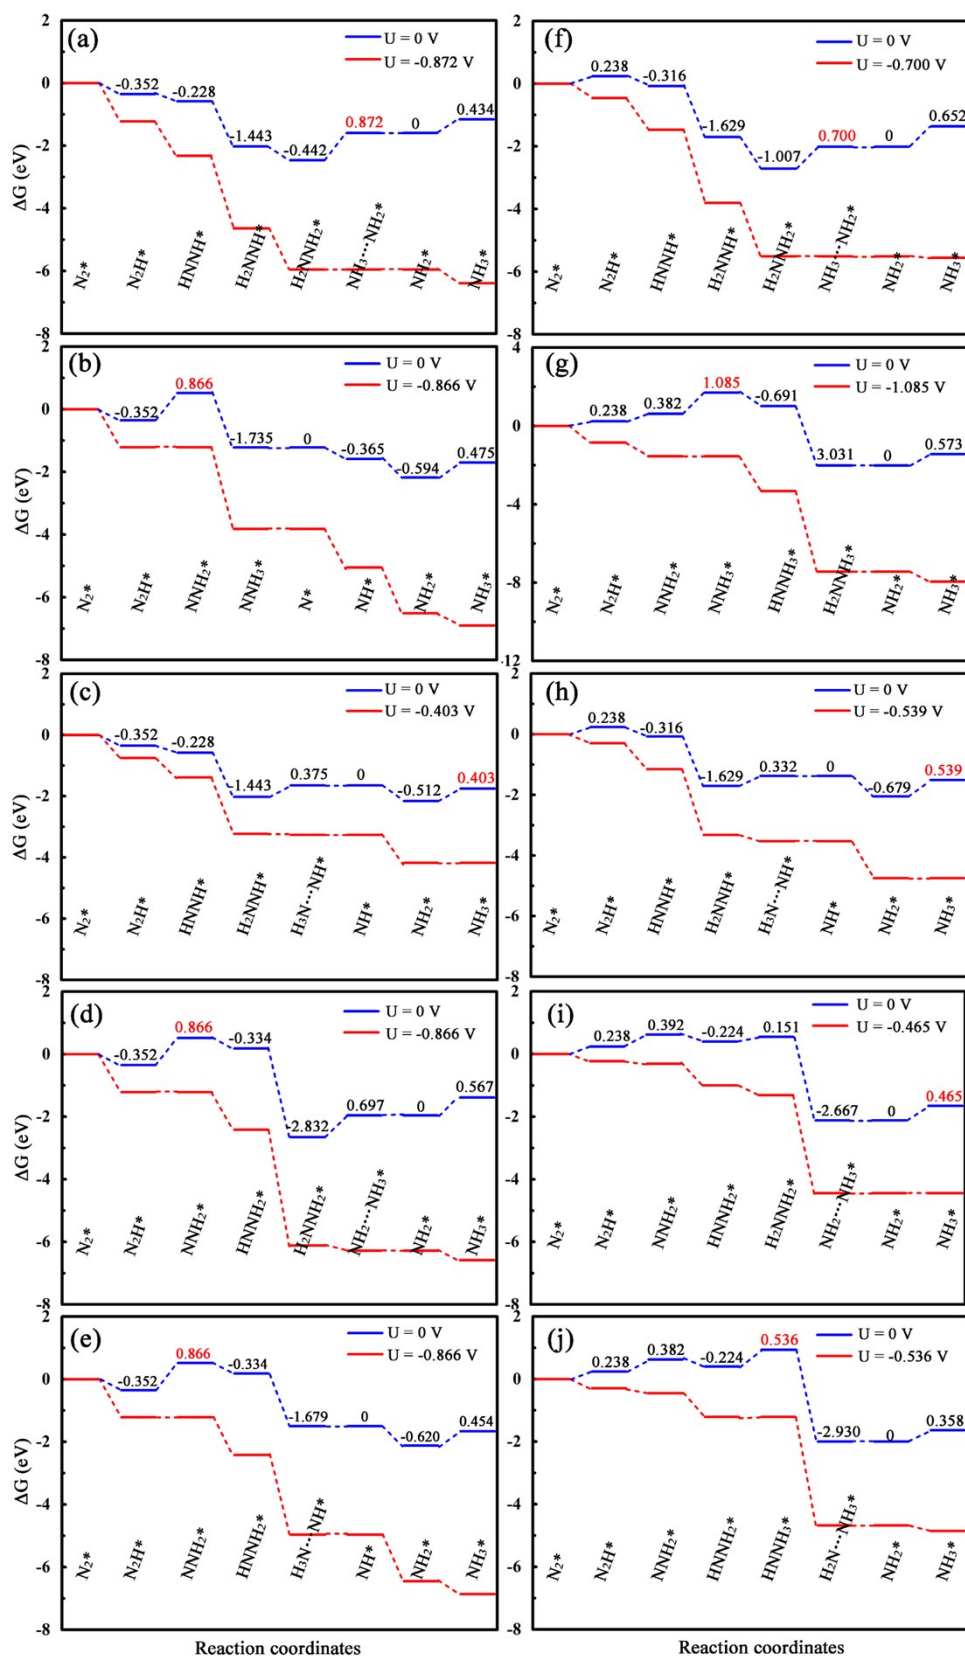

**Fig. S10** Free energy diagrams of  $N_2$  conversion into ammonia on MoB monolayer *via* five different reaction pathways at  $N_2$  adsorption configurations with (a-e) side-on and (f-j) end-on types, respectively.

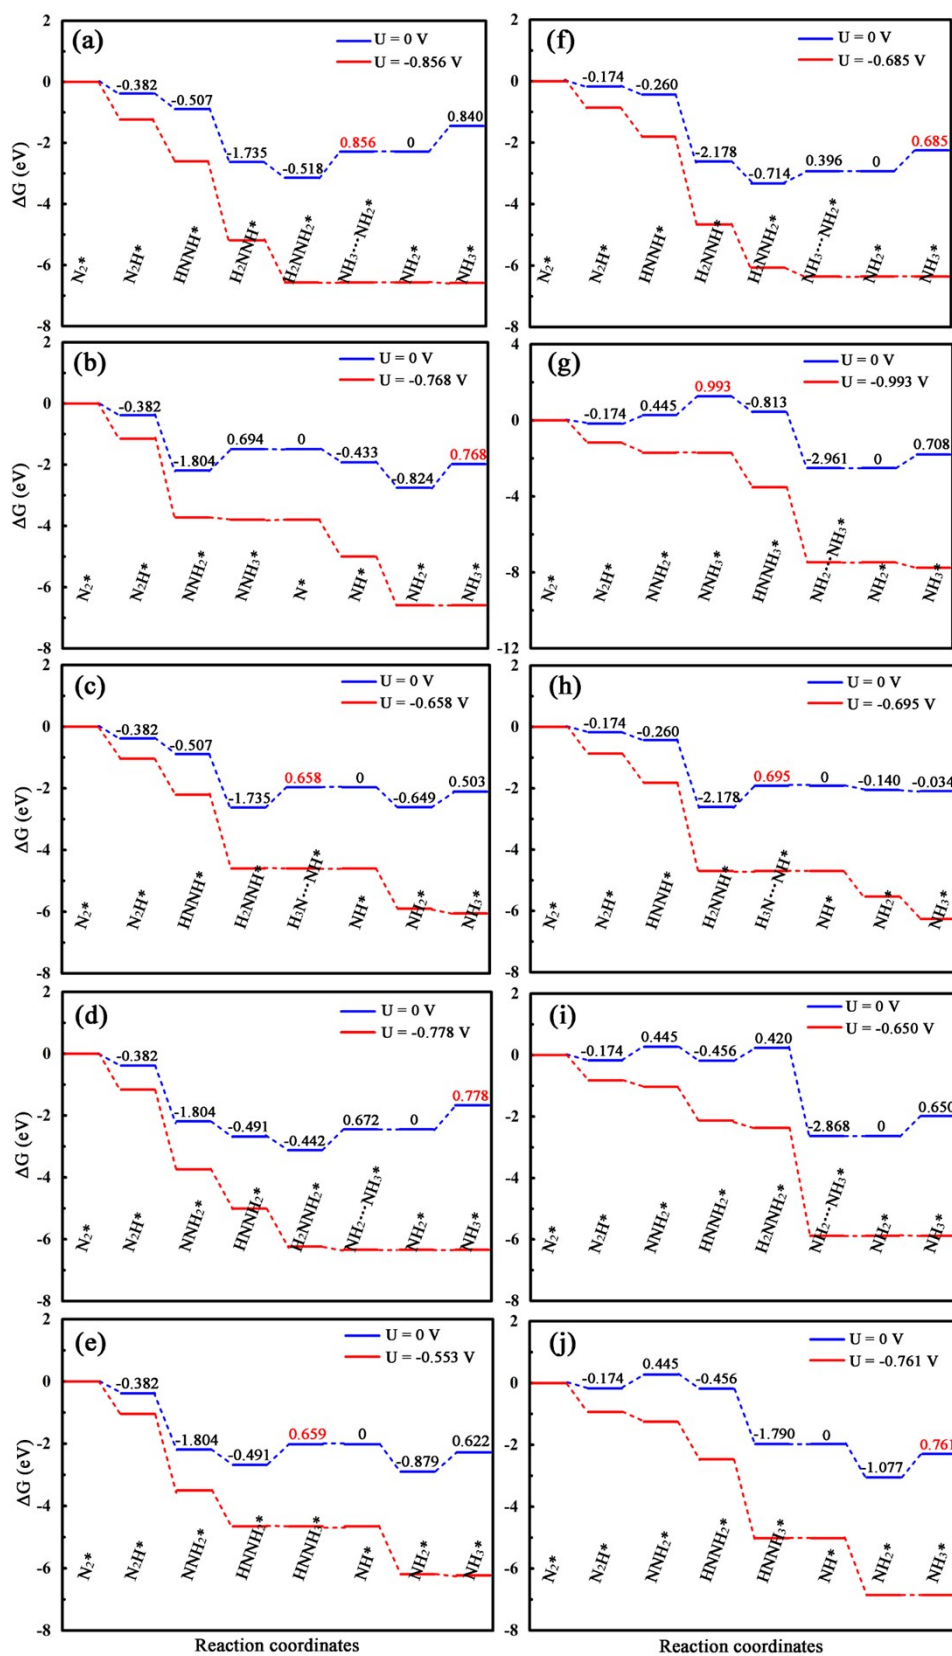

**Fig. S11** Free energy diagrams of  $N_2$  conversion into ammonia on WB monolayer *via* five different reaction pathways at  $N_2$  adsorption configurations with (a-e) side-on and (f-j) end-on types, respectively.

**Table S1.** The energy required to release the ammonia from MB (M=Sc, Ti, V, Cr, Mo, and W) monolayers with the five possible reaction pathways of side-on or end-on configurations (the Gibbs free energy of single NH<sub>3</sub> gas is -19.224 eV).

| Desorption<br>energy (eV) | side-on configuration |              |              |              |              | end-on configuration |              |              |              |              |              |
|---------------------------|-----------------------|--------------|--------------|--------------|--------------|----------------------|--------------|--------------|--------------|--------------|--------------|
|                           | ScB                   | TiB          | CrB          | MoB          | WB           | ScB                  | TiB          | VB           | CrB          | MoB          | WB           |
| <b>Alternating</b>        | <b>0.591</b>          | <b>0.569</b> | 0.712        | 2.729        | 1.364        | 0.574                | 0.536        | <b>3.651</b> | 0.611        | 2.575        | 1.509        |
| <b>Distal</b>             | 0.592                 | 0.559        | 0.684        | 2.673        | 1.443        | 0.631                | <b>0.621</b> | 3.671        | 0.663        | 2.572        | 1.413        |
| <b>Mixed I</b>            | 0.608                 | 0.625        | <b>0.658</b> | <b>2.747</b> | <b>1.594</b> | 0.609                | 0.543        | 3.655        | <b>0.809</b> | 2.625        | 1.285        |
| <b>Mixed II</b>           | 0.611                 | 0.592        | 0.619        | 2.588        | 1.416        | 0.604                | 0.605        | 3.653        | 0.531        | <b>2.689</b> | <b>1.561</b> |
| <b>Mixed III</b>          | 0.580                 | 0.589        | 0.675        | 2.692        | 1.559        | <b>0.659</b>         | 0.569        | 3.665        | 0.632        | 2.761        | 1.429        |
